# Supplementary material
Source: PubMed Central journal article supplement (PMC5808912)
Supplement: NIHMS927589-supplement.pdf [file NIHMS927589-supplement.pdf]

## Electronic Supplementary Information for:

Conjugation of carbohydrates to proteins using of di(triethylene glycol monomethyl ether) squaric acid ester revisited

*Peng Xu, Michael N. Trinh, and Pavol Kováč*

*NIDDK, LBC, National Institutes of Health, Bethesda, MD 20892-0815 (U.S.A.)*

### Table of Contents

|                                                                |    |
|----------------------------------------------------------------|----|
| NMR spectra of compound <b>2</b> .....                         | 2  |
| HRMS spectrum of compound <b>2</b> .....                       | 4  |
| NMR spectra of compound <b>5</b> .....                         | 5  |
| HRMS spectrum of compound <b>5</b> .....                       | 7  |
| NMR spectra of compound <b>6</b> .....                         | 8  |
| HRMS spectrum of compound <b>6</b> .....                       | 10 |
| NMR spectra of compound <b>10</b> .....                        | 11 |
| HRMS spectrum of compound <b>10</b> .....                      | 15 |
| SELDI-TOF-MS of conjugating <b>8</b> to BSA in buffer B .....  | 16 |
| SELDI-TOF-MS of conjugating <b>8</b> to BSA in buffer C .....  | 17 |
| SELDI-TOF-MS of conjugating <b>10</b> to BSA in buffer B ..... | 18 |
| SELDI-TOF-MS of conjugating <b>10</b> to BSA in buffer C ..... | 19 |

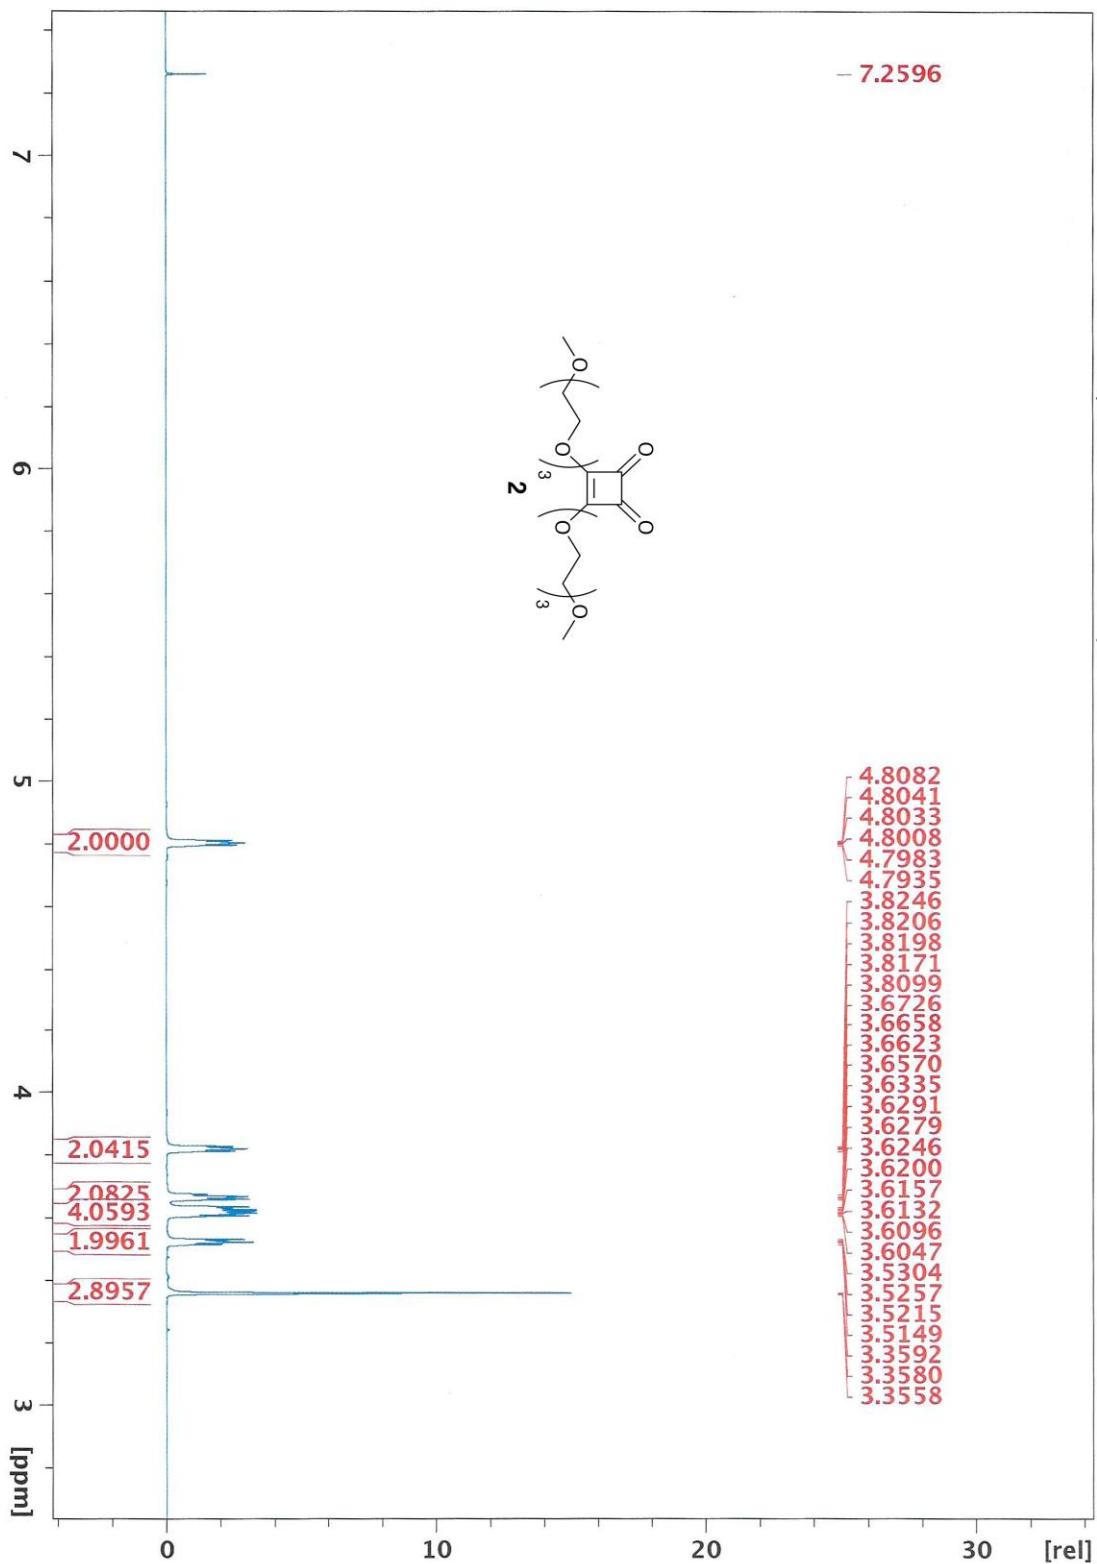

g. S1 <sup>1</sup>H-NMR of compound 2

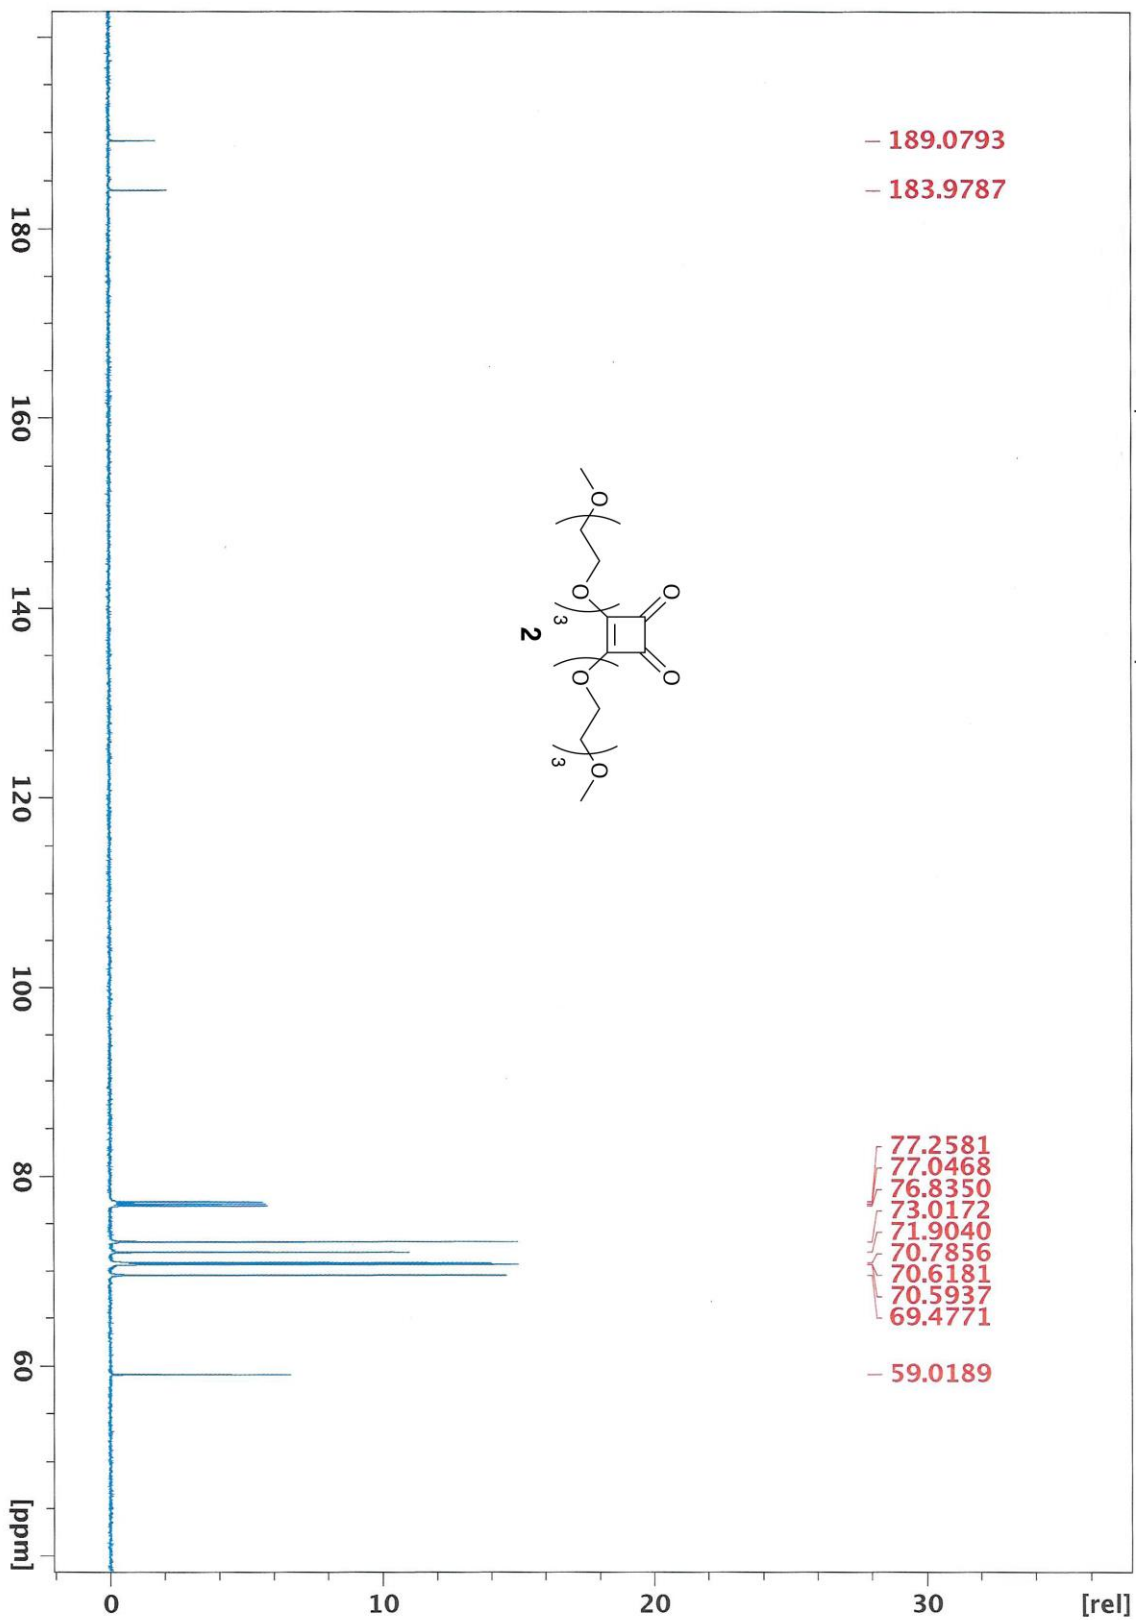

Fig. S2 <sup>13</sup>C-NMR of compound 2

322 (5.490) Sm (SG, 3x5.00); Cm (322-18x5.000)

TOF MS ES+  
150

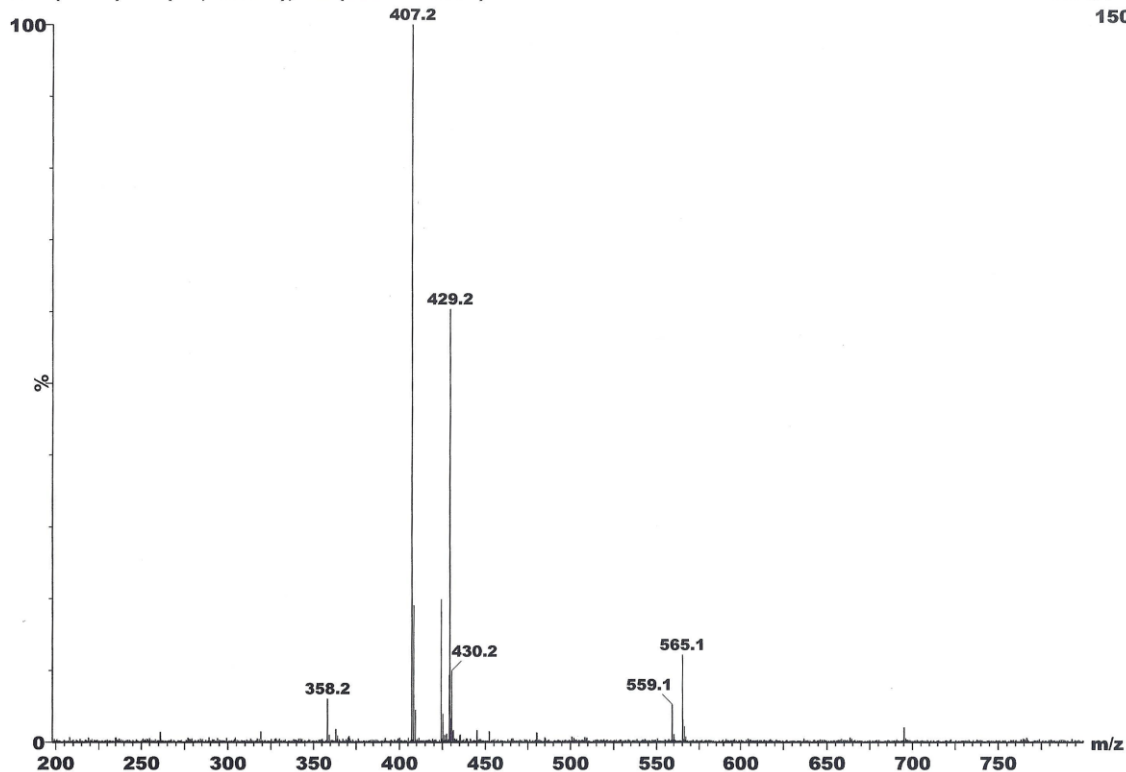

Elemental Composition Report

Page 1

Single Mass Analysis

Tolerance = 25.0 mDa / DBE: min = -2.0, max = 500.0

Element prediction: Off

Number of isotope peaks used for i-FIT = 3

Monoisotopic Mass, Even Electron Ions

95 formula(e) evaluated with 8 results within limits (up to 19 closest results for each mass)

Elements Used:

C: 0-100 H: 0-200 O: 0-30

320 (5.456) Cn (Cen,7, 50.00, Ar); Sm (SG, 3x5.00); Sb (12,5.00)

TOF MS ES+  
4.92e+003

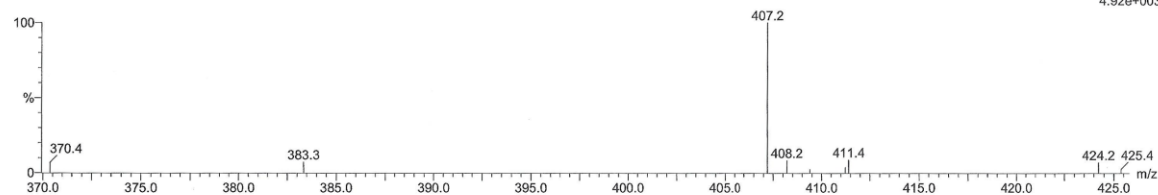

Minimum:

Maximum: 25.0 10.0 -2.0

Maximum:

25.0 10.0 500.0

| Mass     | Calc. Mass | mDa   | PPM   | DBE  | i-FIT | Formula     |
|----------|------------|-------|-------|------|-------|-------------|
| 407.1922 | 407.1917   | 0.5   | 1.2   | 3.5  | 386.3 | C18 H31 O10 |
|          | 407.1858   | 6.4   | 15.7  | 12.5 | 693.5 | C25 H27 O5  |
|          | 407.2011   | -8.9  | -21.9 | 16.5 | 850.3 | C29 H27 O2  |
|          | 407.1800   | 12.2  | 30.0  | 21.5 | 988.6 | C32 H23     |
|          | 407.2070   | -14.8 | -36.3 | 7.5  | 564.8 | C22 H31 O7  |
|          | 407.1765   | 15.7  | 38.6  | -0.5 | 268.7 | C14 H31 O13 |
|          | 407.2129   | -20.7 | -50.8 | -1.5 | 292.2 | C15 H35 O12 |
|          | 407.1706   | 21.6  | 53.0  | 8.5  | 571.6 | C21 H27 O8  |

Fig. S3 HRMS of compound 2

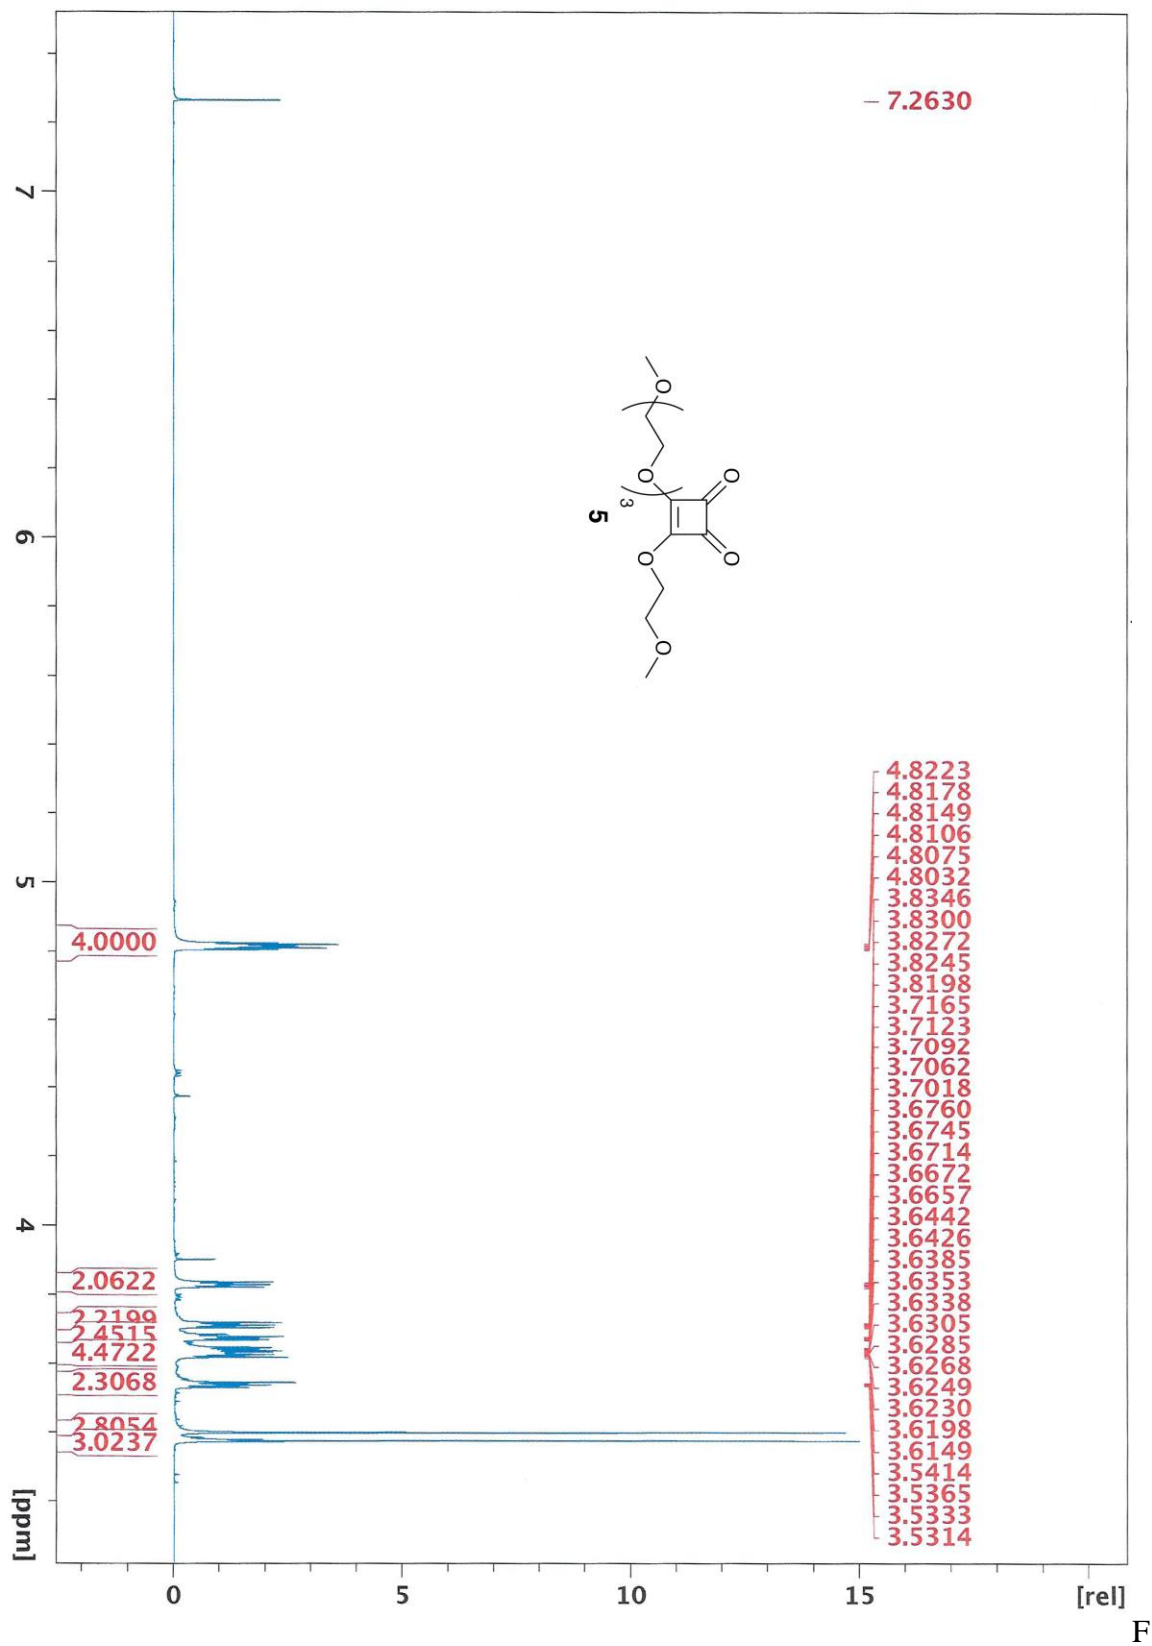

ig. S4 <sup>1</sup>H-NMR of compound **5**

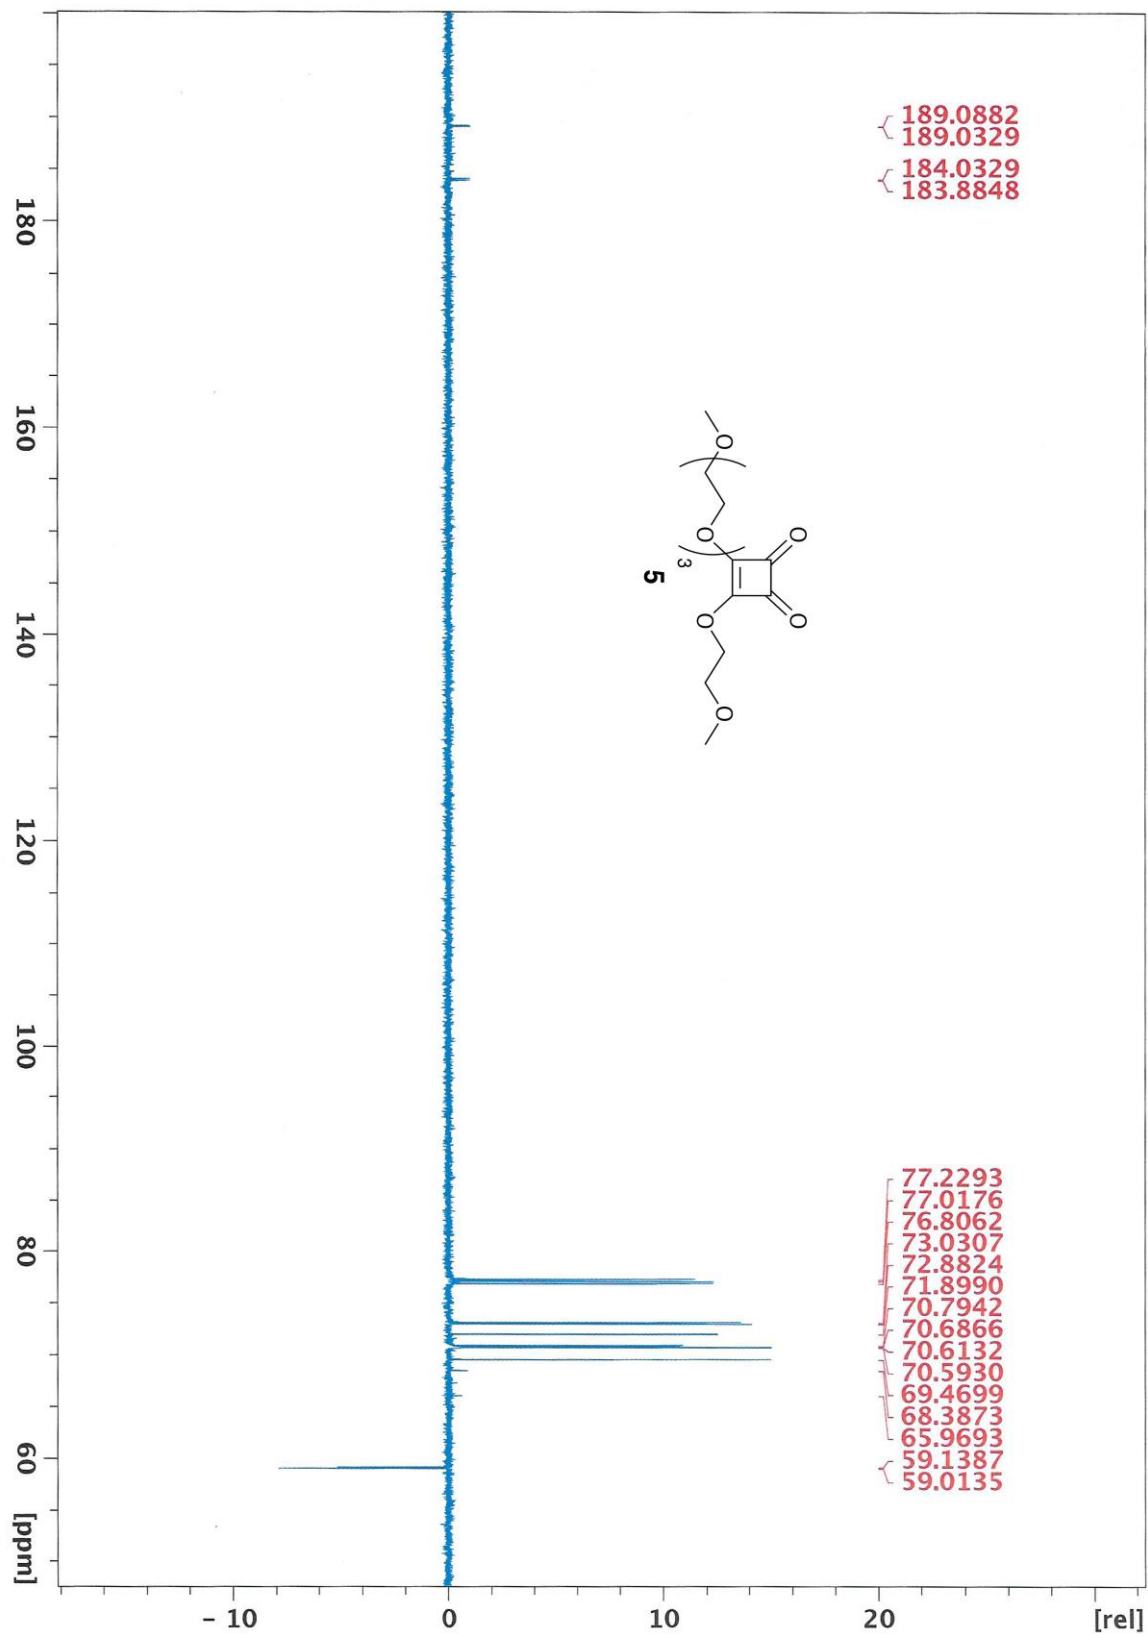

Fig. S5 <sup>13</sup>C-NMR of compound 5

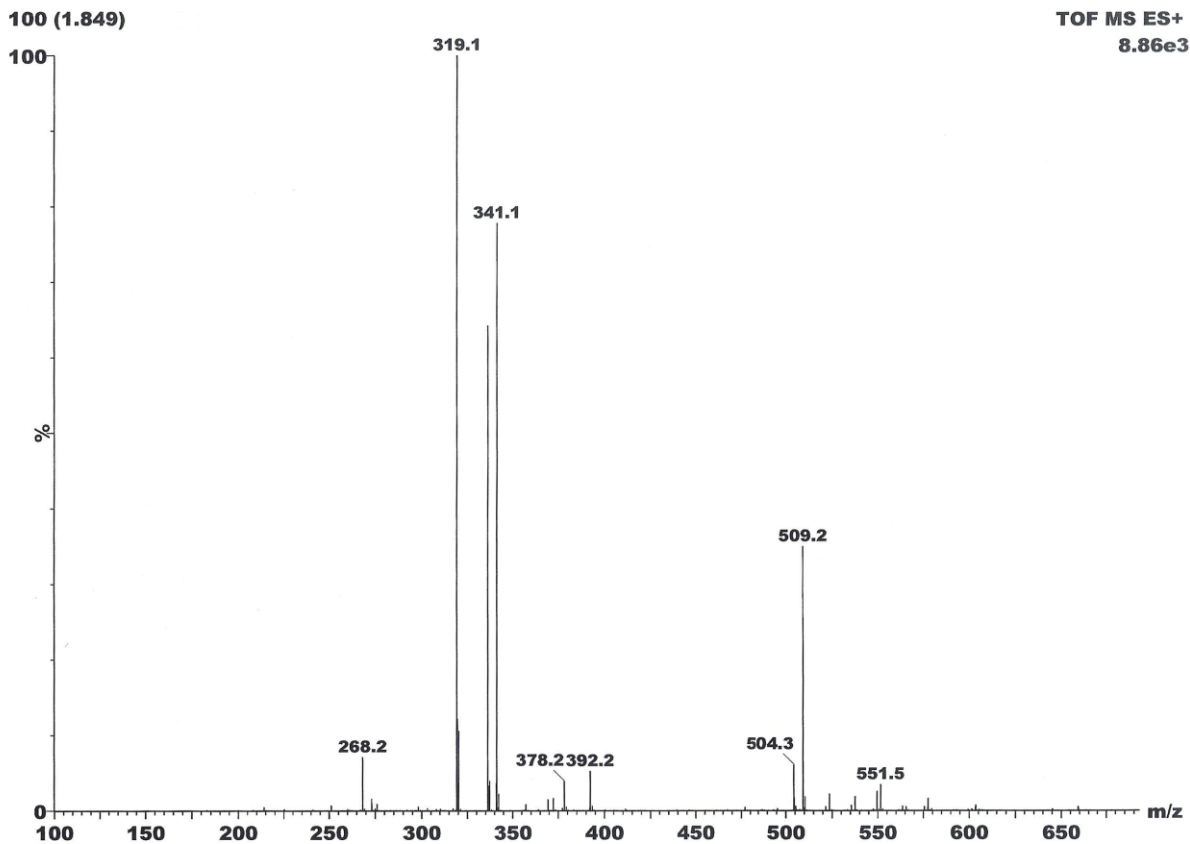

**Elemental Composition Report**

Page 1

**Single Mass Analysis**

Tolerance = 25.0 mDa / DBE: min = -2.0, max = 500.0  
 Element prediction: Off  
 Number of isotope peaks used for i-FIT = 3

Monoisotopic Mass, Even Electron Ions

63 formula(e) evaluated with 7 results within limits (up to 19 closest results for each mass)

Elements Used:

C: 0-100 H: 0-200 O: 0-40

131 (2.423) Cn (Cen,5, 50.00, Ar); Sm (SG, 1x2.00); Sb (12,5.00)

TOF MS ES+  
2.53e+003

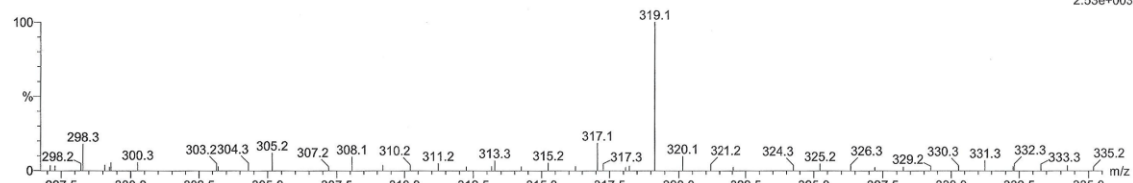

Minimum: -2.0  
 Maximum: 500.0

| Mass     | Calc. Mass | mDa   | PPM   | DBE  | i-FIT | Formula     |
|----------|------------|-------|-------|------|-------|-------------|
| 319.1393 | 319.1393   | 0.0   | 0.0   | 3.5  | 54.0  | C14 H23 O8  |
|          | 319.1334   | 5.9   | 18.5  | 12.5 | 180.5 | C21 H19 O3  |
|          | 319.1487   | -9.4  | -29.5 | 16.5 | 263.1 | C25 H19     |
|          | 319.1545   | -15.2 | -47.6 | 7.5  | 135.9 | C18 H23 O5  |
|          | 319.1240   | 15.3  | 47.9  | -0.5 | 33.0  | C10 H23 O11 |
|          | 319.1182   | 21.1  | 66.1  | 8.5  | 139.4 | C17 H19 O6  |
|          | 319.1604   | -21.1 | -66.1 | -1.5 | 51.6  | C11 H27 O10 |

Fig. S6 HRMS of compound 5

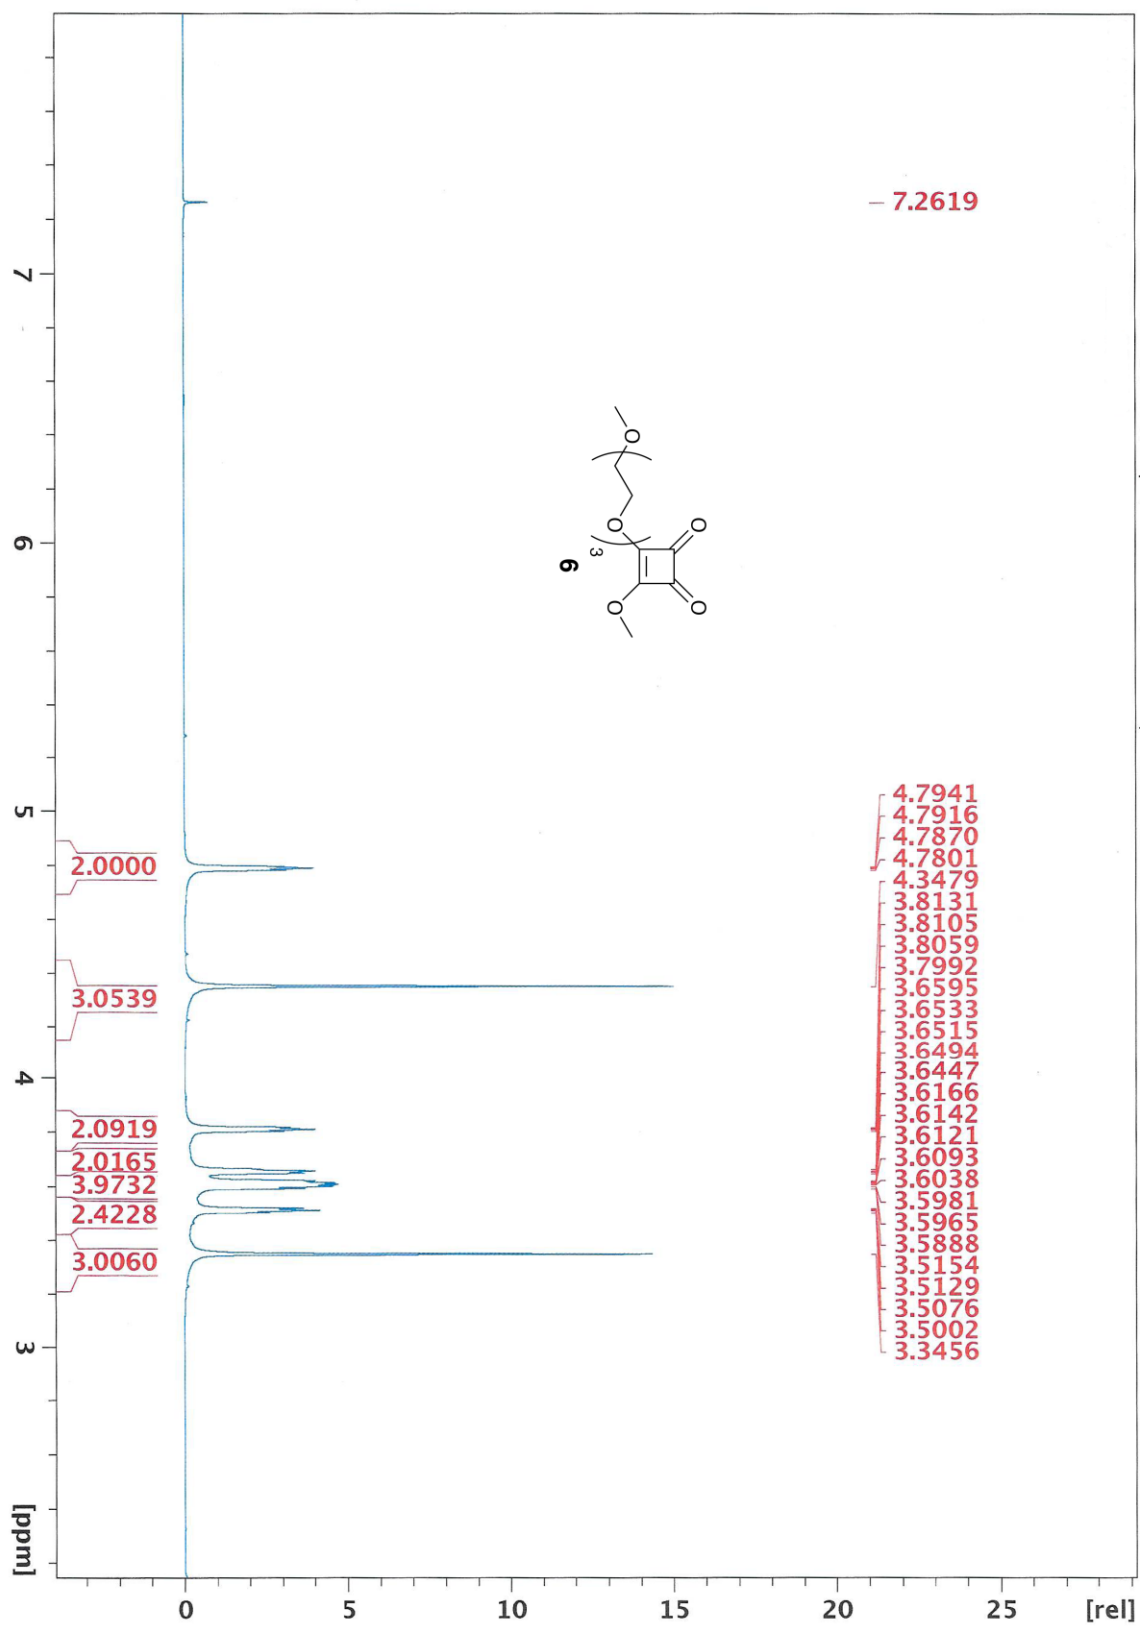

Fig. S7 <sup>1</sup>H-NMR of compound 6



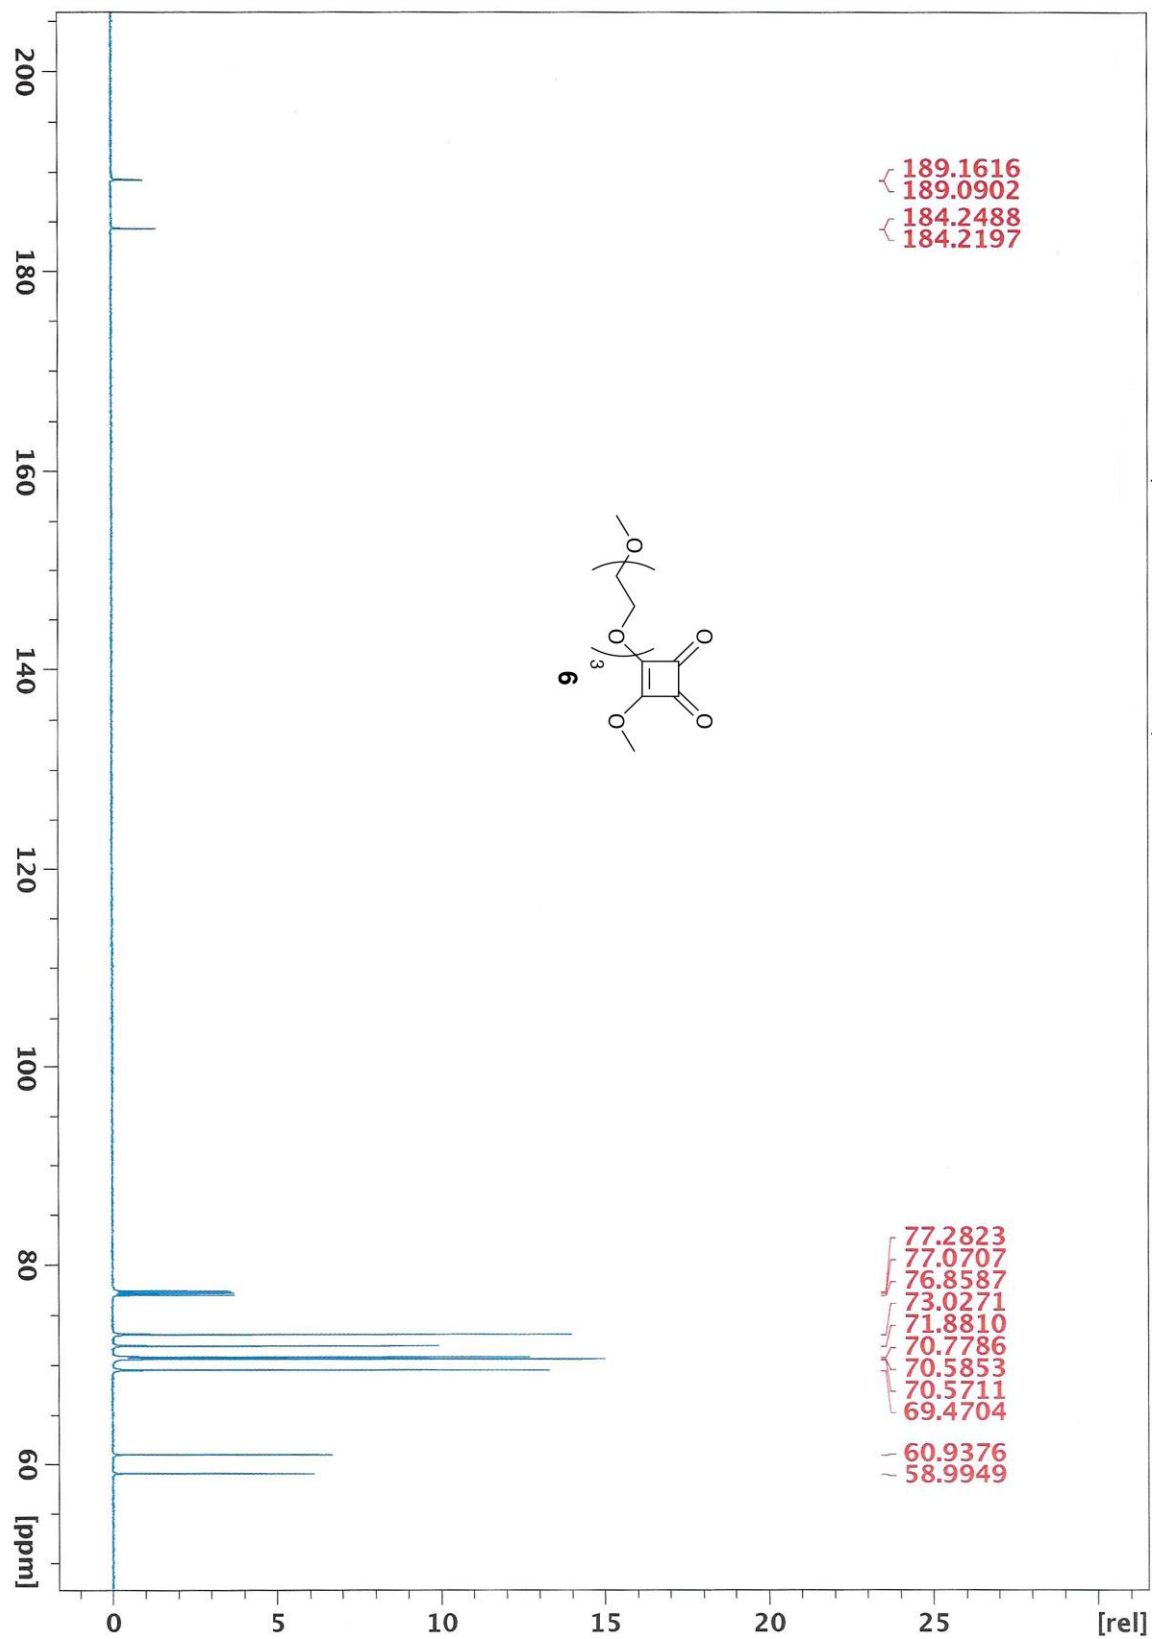

Fig. S8  $^{13}\text{C}$ -NMR of compound **6**

66 (1.220)

TOF MS ES+  
9.56e3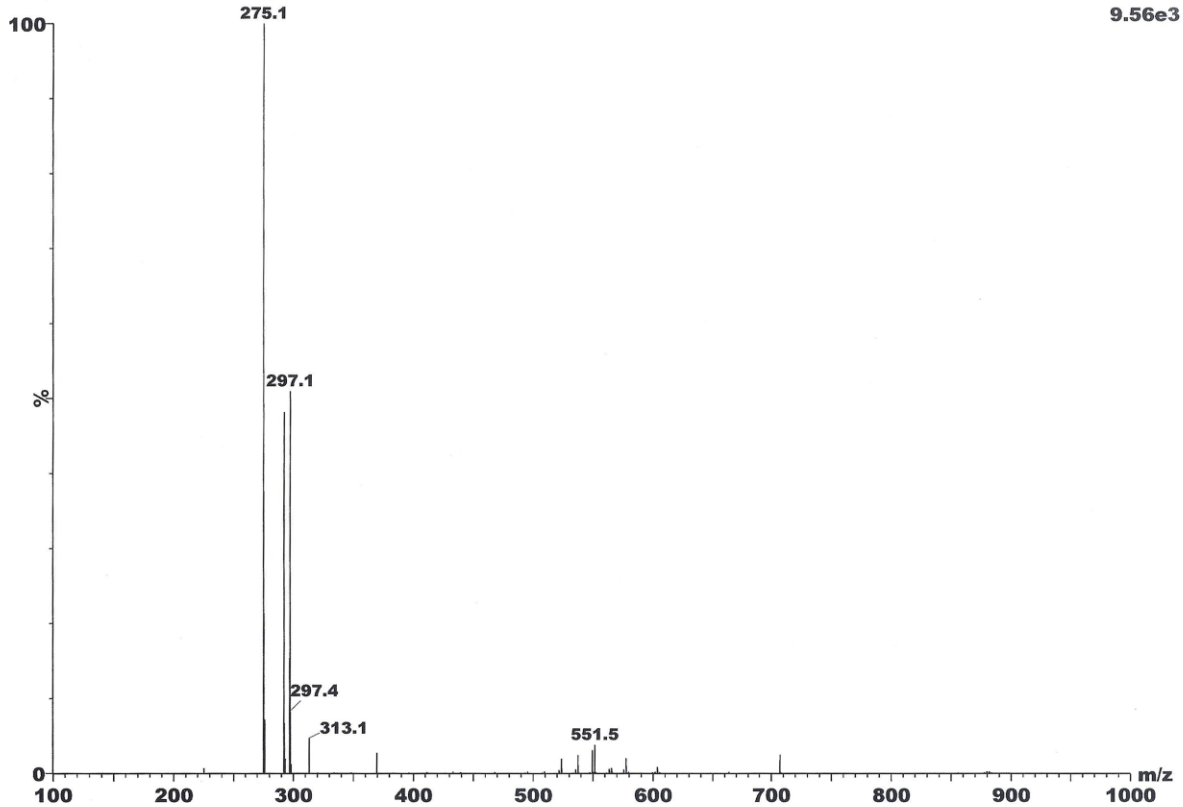

## Elemental Composition Report

Page 1

## Single Mass Analysis

Tolerance = 25.0 mDa / DBE: min = -2.0, max = 500.0

Element prediction: Off

Number of isotope peaks used for i-FIT = 3

Monoisotopic Mass, Even Electron Ions

51 formula(e) evaluated with 6 results within limits (up to 19 closest results for each mass)

Elements Used:

C: 0-100 H: 0-200 O: 0-40

120 (2.219) Cn (Cen,5, 50.00, Ar); Sm (SG, 1x2.00); Sb (12,5.00)

TOF MS ES+  
6.69e+003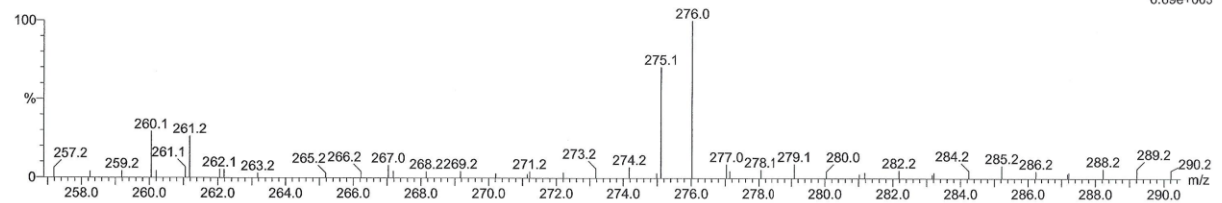

Minimum: -2.0  
Maximum: 25.0 10.0 500.0

| Mass     | Calc. Mass | mDa   | PPM   | DBE  | i-FIT  | Formula    |
|----------|------------|-------|-------|------|--------|------------|
| 275.1129 | 275.1131   | -0.2  | -0.7  | 3.5  | 4761.0 | C12 H19 O7 |
|          | 275.1072   | 5.7   | 20.7  | 12.5 | 4153.0 | C19 H15 O2 |
|          | 275.0978   | 15.1  | 54.9  | -0.5 | 4392.4 | C8 H19 O10 |
|          | 275.1283   | -15.4 | -56.0 | 7.5  | 5326.8 | C16 H19 O4 |
|          | 275.0919   | 21.0  | 76.3  | 8.5  | 3861.4 | C15 H15 O5 |
|          | 275.1342   | -21.3 | -77.4 | -1.5 | 6043.3 | C9 H23 O9  |

Fig. S9 HRMS of compound 6

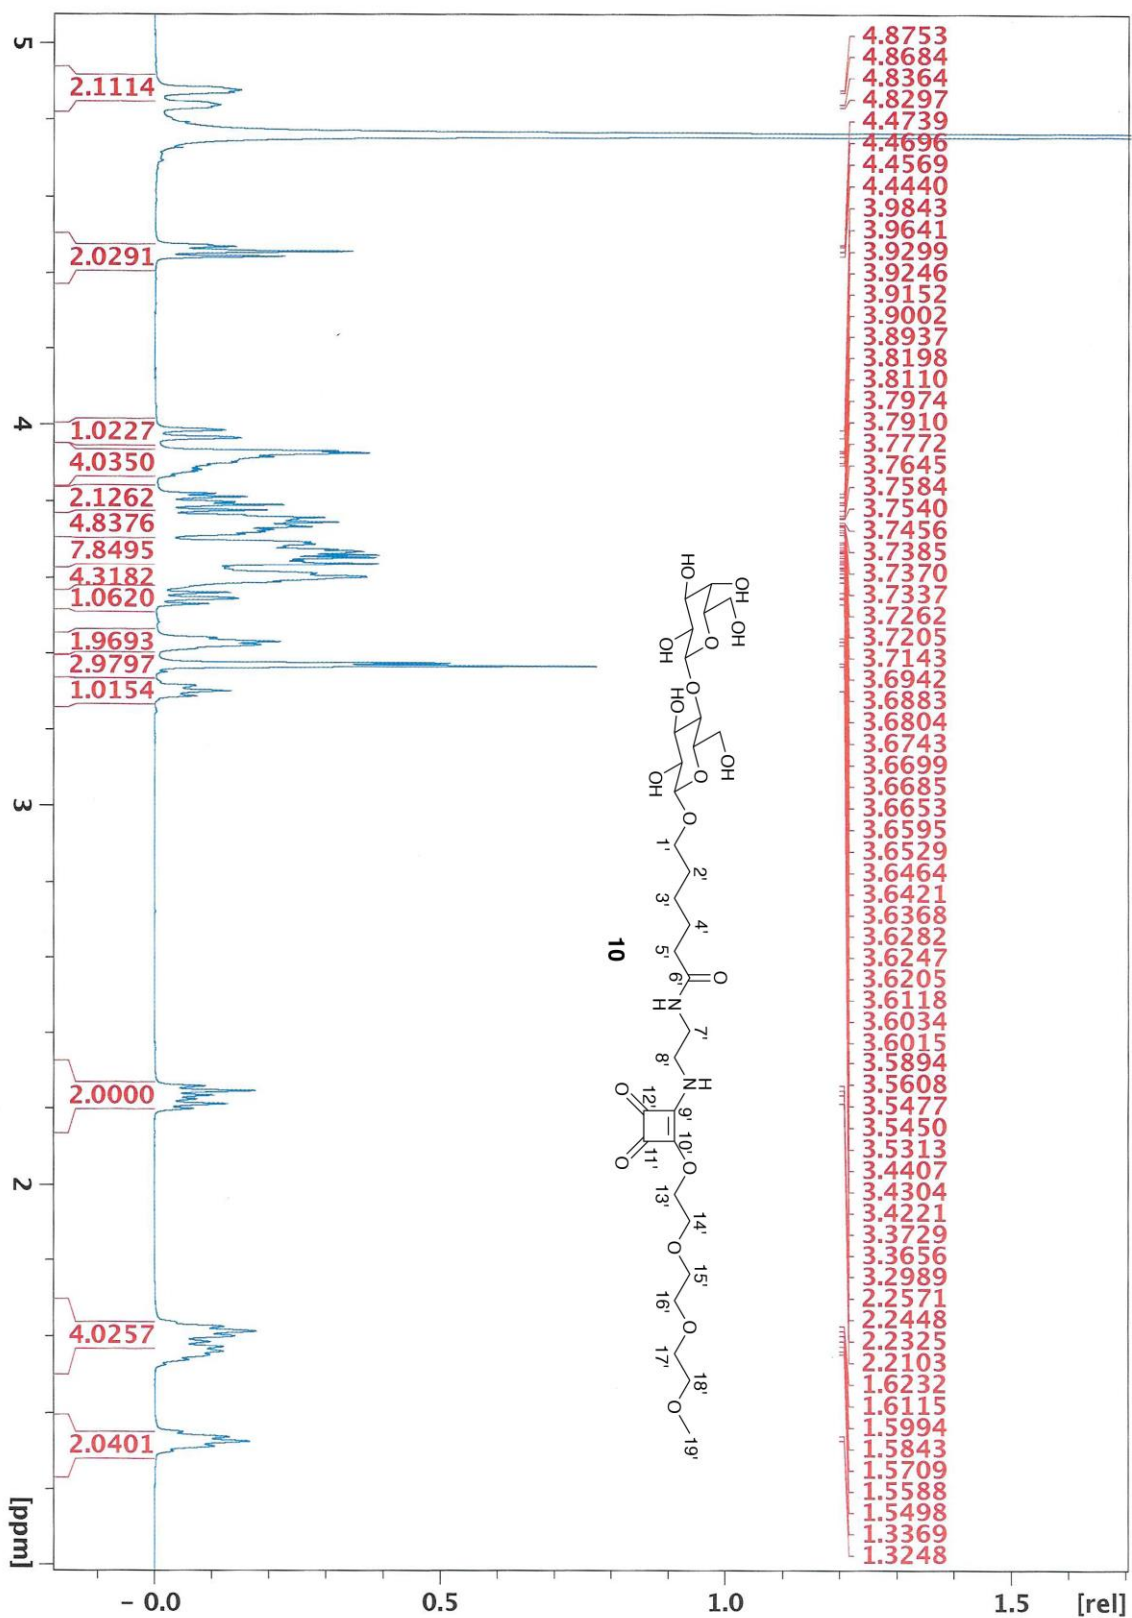

Fig. S10  $^1\text{H-NMR}$  of compound **10**

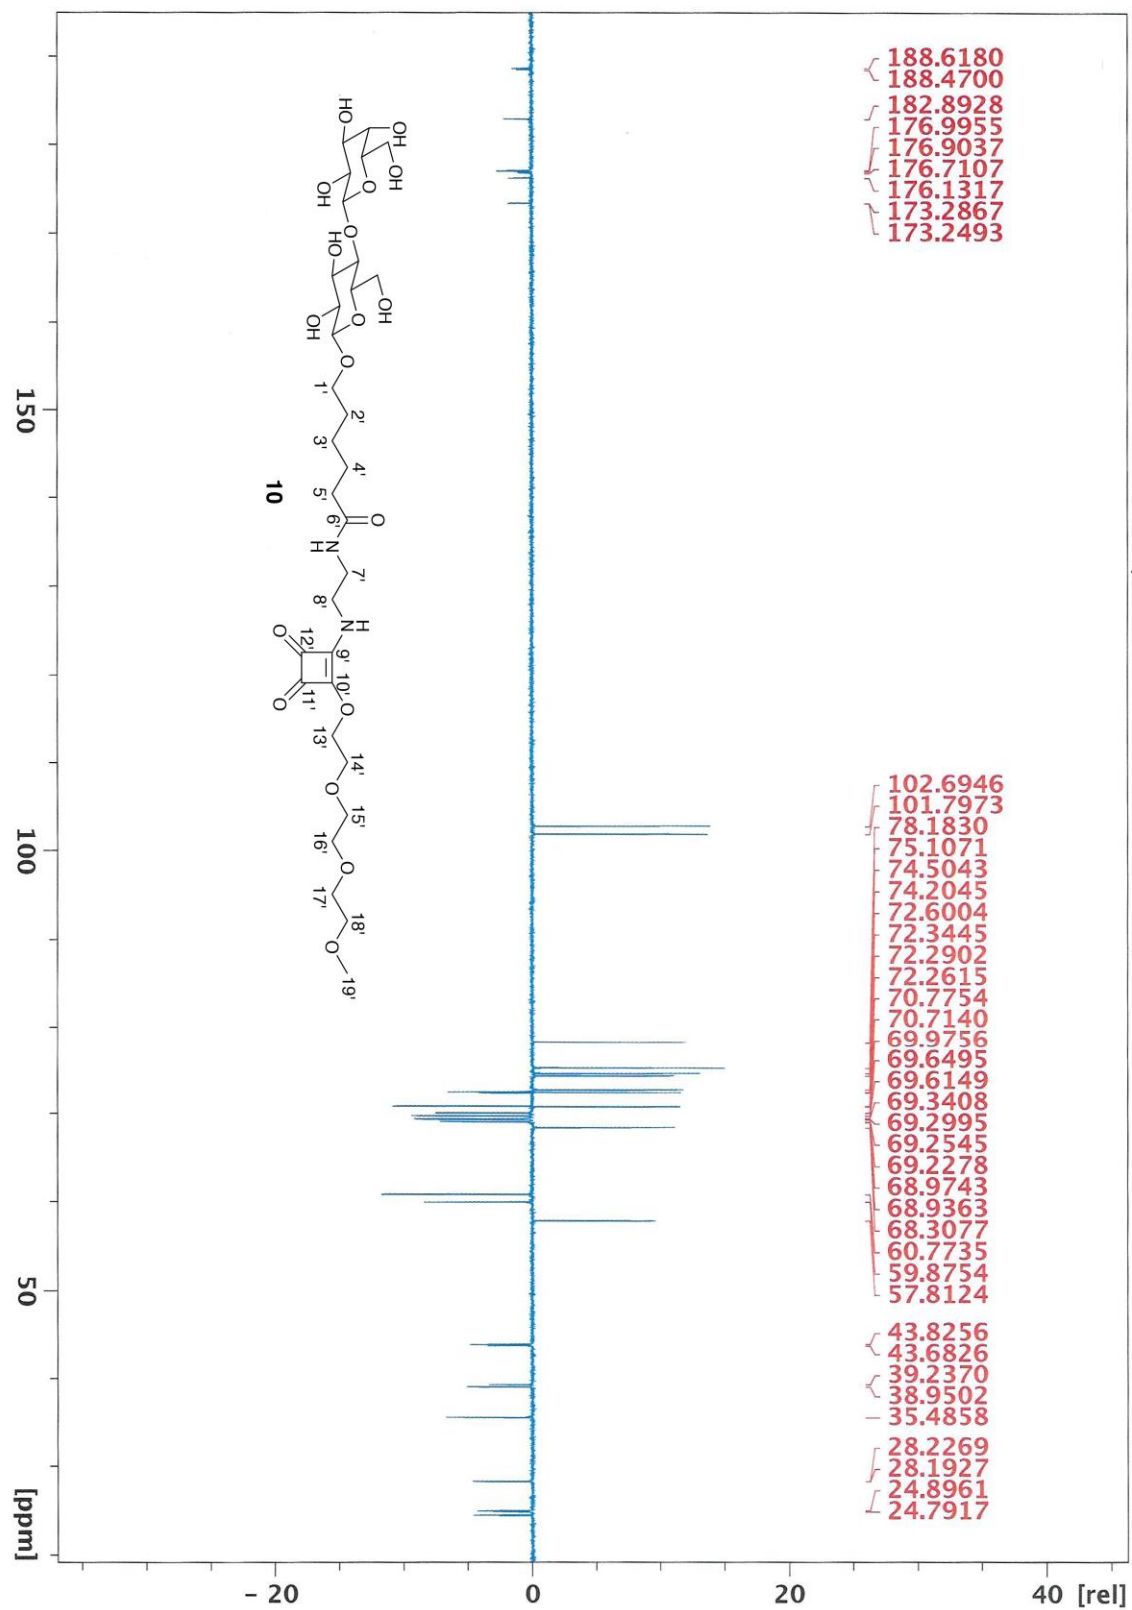

Fig. S11  $^{13}\text{C}$ -NMR of compound **10**

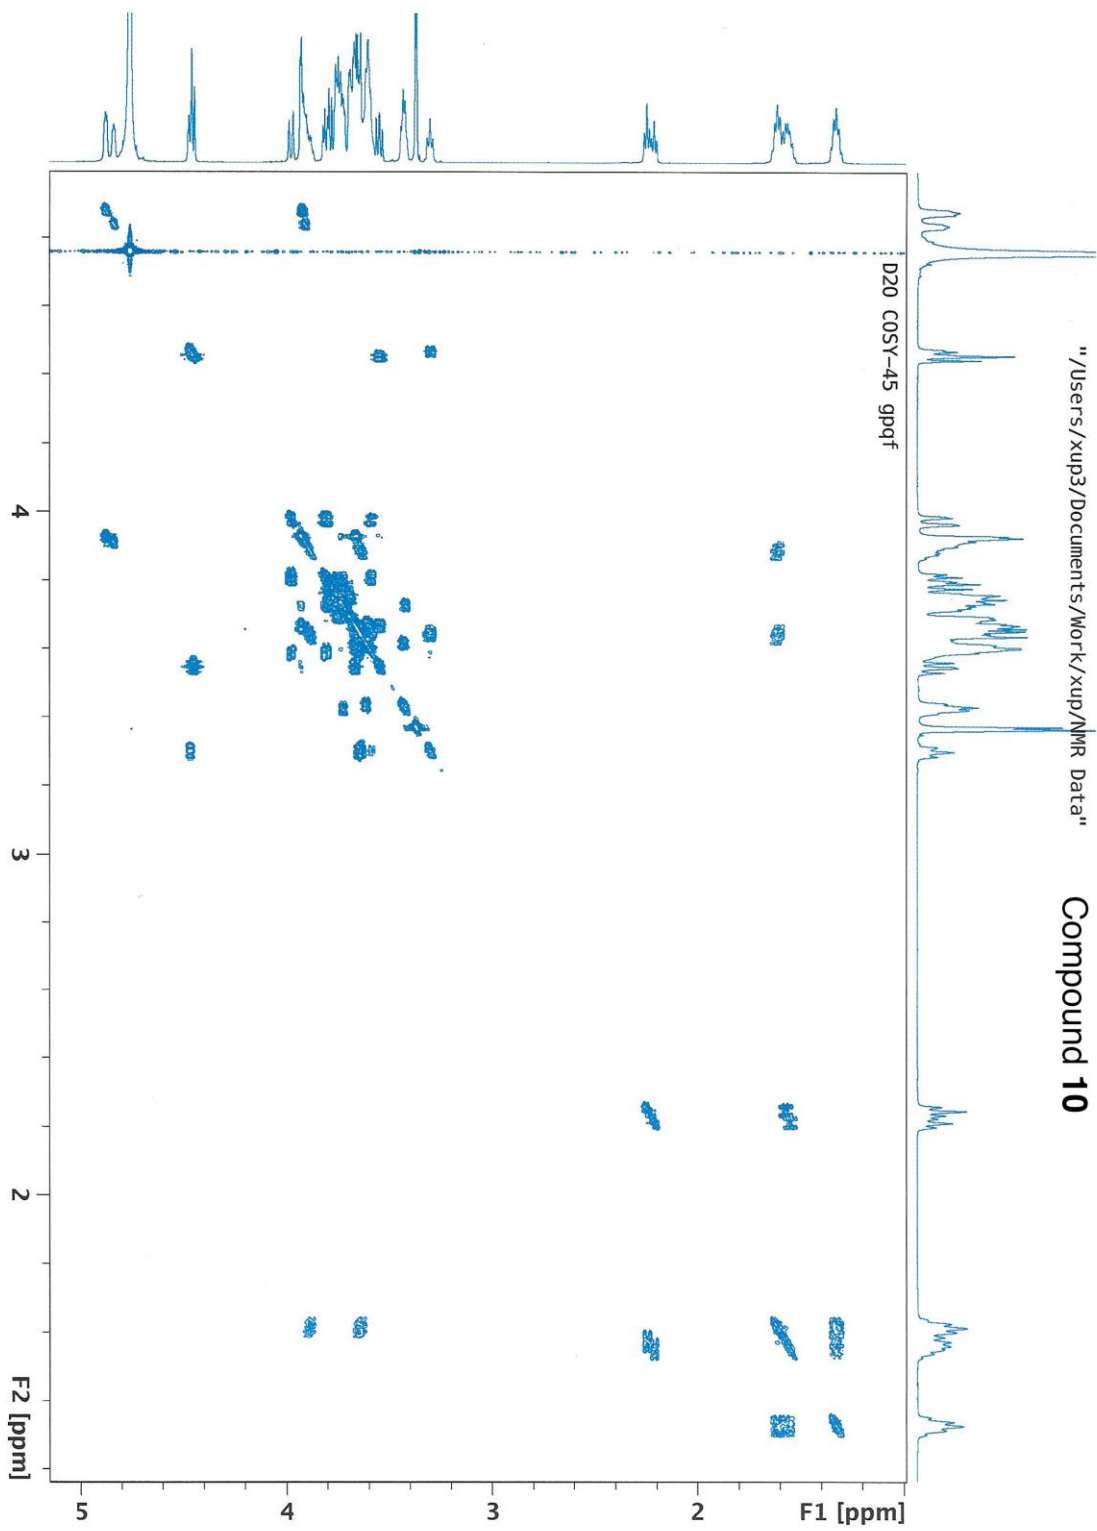

F

ig. S12 COSY of compound **10**

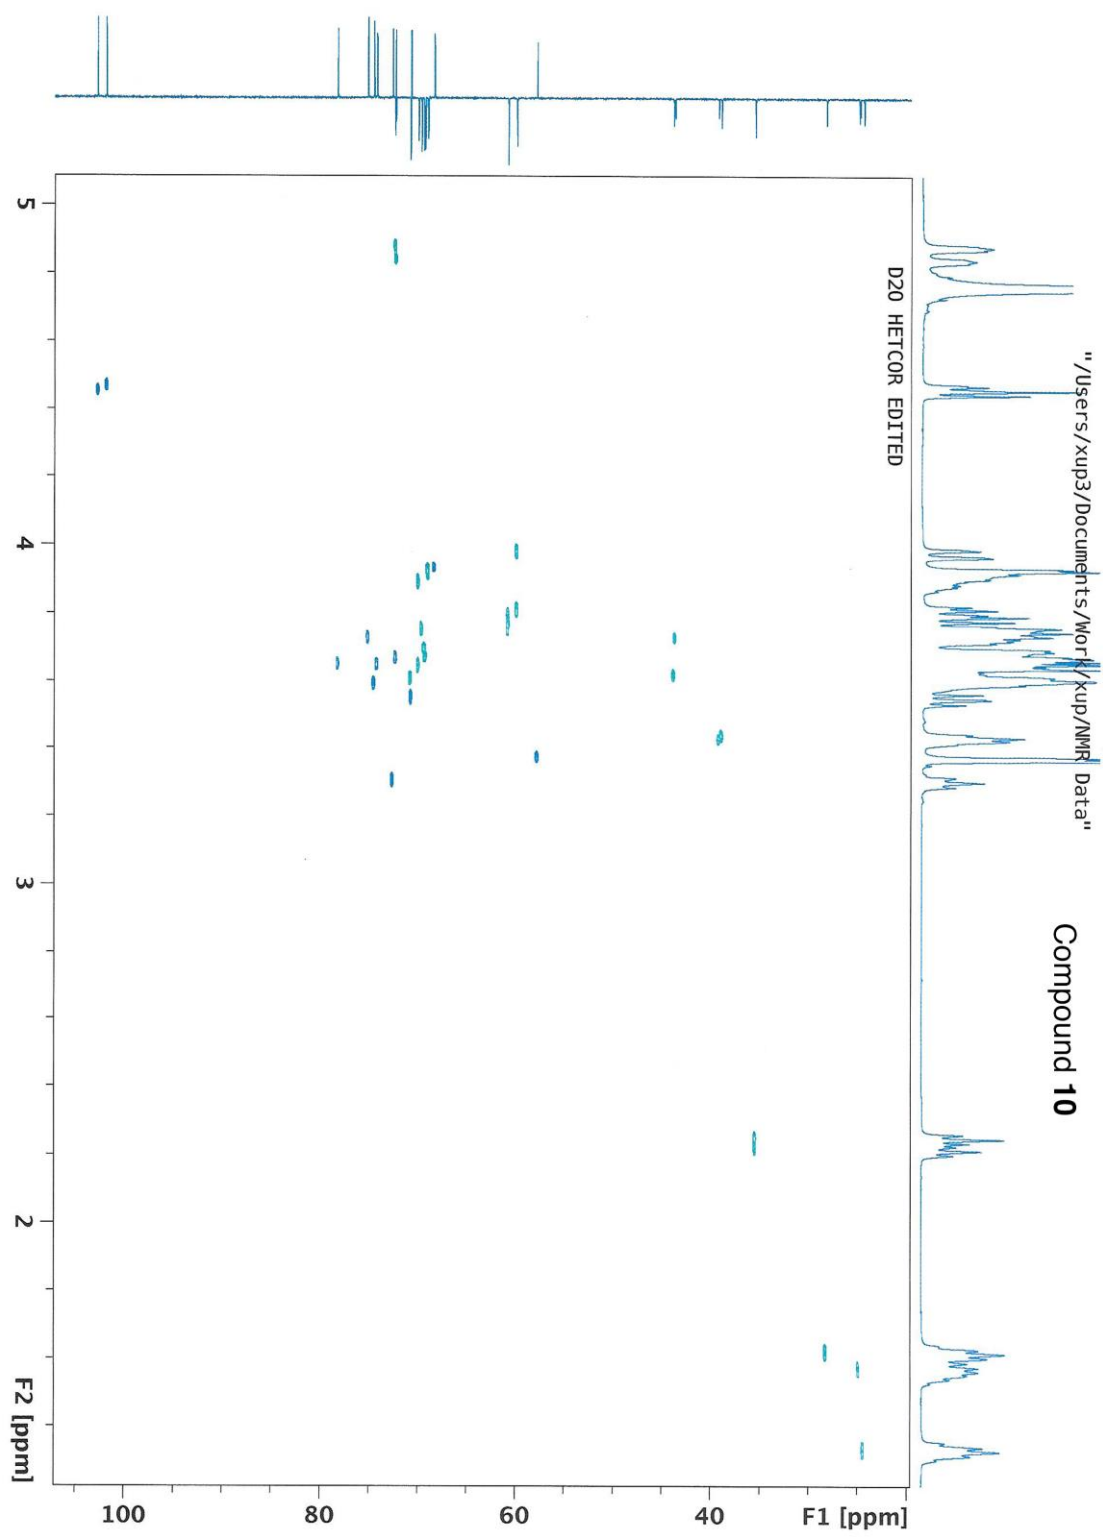

Fig. S13 HSQC of compound 10

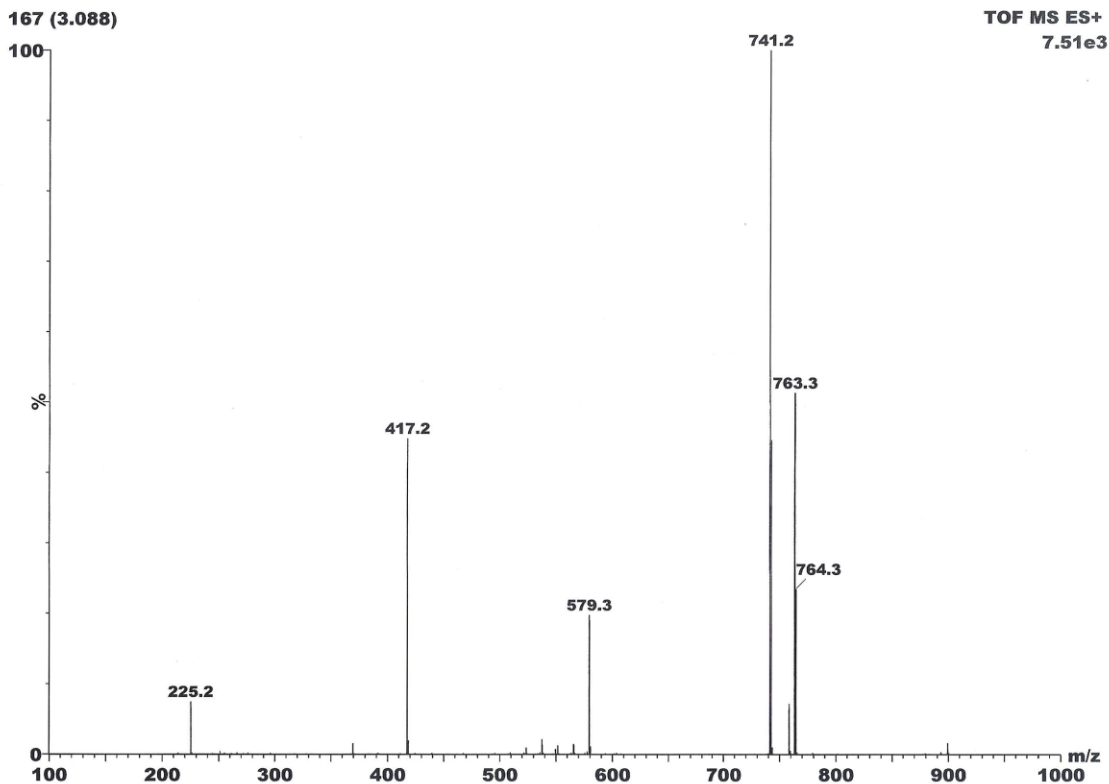

Elemental Composition Report

Page 1

Single Mass Analysis

Tolerance = 25.0 mDa / DBE: min = -2.0, max = 500.0

Element prediction: Off

Number of isotope peaks used for i-FIT = 3

Monoisotopic Mass, Even Electron Ions

240 formula(e) evaluated with 13 results within limits (up to 19 closest results for each mass)

Elements Used:

C: 0-100 H: 0-200 N: 2-2 O: 0-40

170 (3.144) Cn (Cen,5, 50.00, Ar); Sm (SG, 1x2.00); Sb (12,5.00)

TOF MS ES+  
3.79e+003

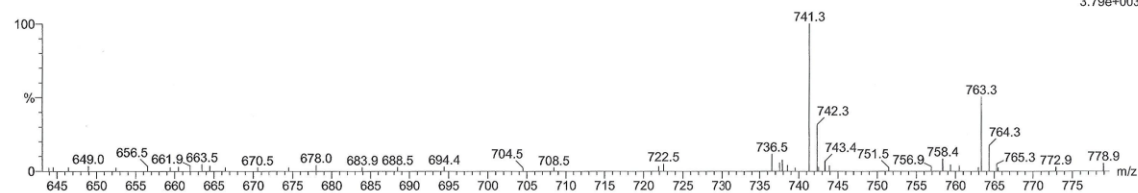

Minimum: -2.0  
Maximum: 25.0 10.0 500.0

| Mass     | Calc. Mass | mDa   | PPM   | DBE  | i-FIT | Formula        |
|----------|------------|-------|-------|------|-------|----------------|
| 741.3292 | 741.3293   | -0.1  | -0.1  | 6.5  | 44.9  | C31 H53 N2 O18 |
|          | 741.3270   | 2.2   | 3.0   | 37.5 | 425.8 | C56 H41 N2     |
|          | 741.3328   | -3.6  | -4.9  | 28.5 | 291.8 | C49 H45 N2 O5  |
|          | 741.3235   | 5.7   | 7.7   | 15.5 | 118.9 | C38 H49 N2 O13 |
|          | 741.3387   | -9.5  | -12.8 | 19.5 | 174.4 | C42 H49 N2 O10 |
|          | 741.3176   | 11.6  | 15.6  | 24.5 | 227.8 | C45 H45 N2 O8  |
|          | 741.3141   | 15.1  | 20.4  | 2.5  | 33.4  | C27 H53 N2 O21 |
|          | 741.3446   | -15.4 | -20.8 | 10.5 | 84.3  | C35 H53 N2 O15 |
|          | 741.3117   | 17.5  | 23.6  | 33.5 | 359.4 | C52 H41 N2 O3  |
|          | 741.3481   | -18.9 | -25.5 | 32.5 | 372.9 | C53 H45 N2 O2  |
|          | 741.3082   | 21.0  | 28.3  | 11.5 | 86.5  | C34 H49 N2 O16 |
|          | 741.3505   | -21.3 | -28.7 | 1.5  | 35.4  | C28 H57 N2 O20 |
|          | 741.3540   | -24.8 | -33.5 | 23.5 | 250.4 | C46 H49 N2 O7  |

Fig. S14 HRMS of compound 10



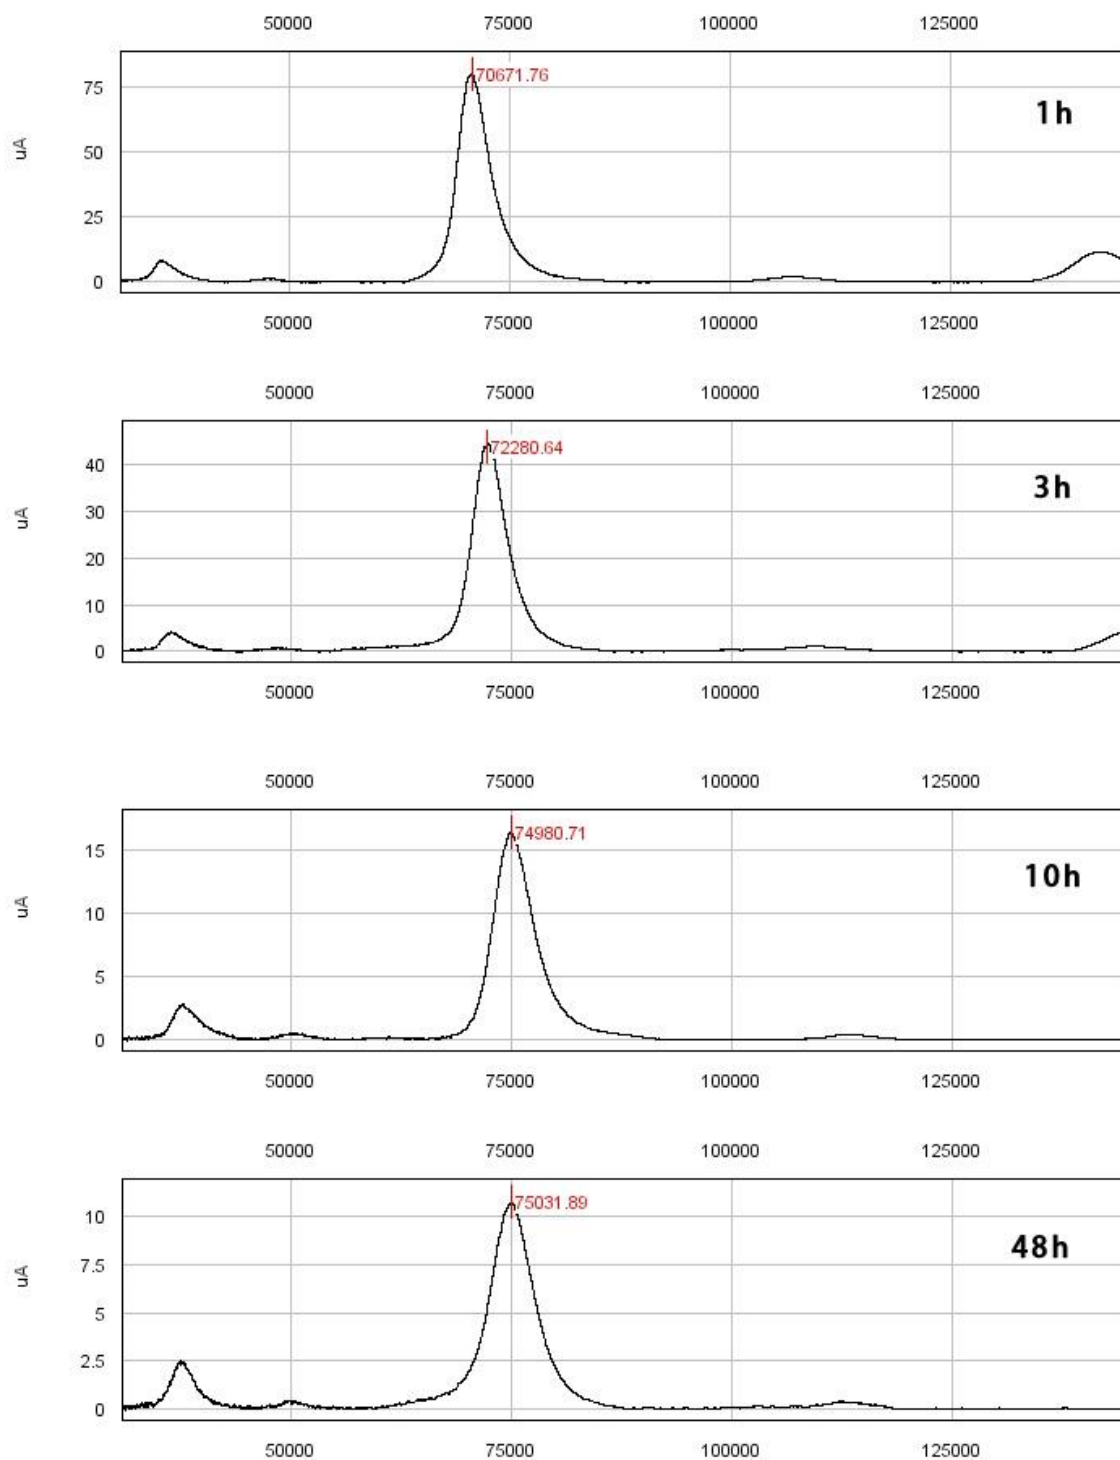

Fig. S15. SELDI-TOF monitoring of conjugation of **8** to BSA in buffer B

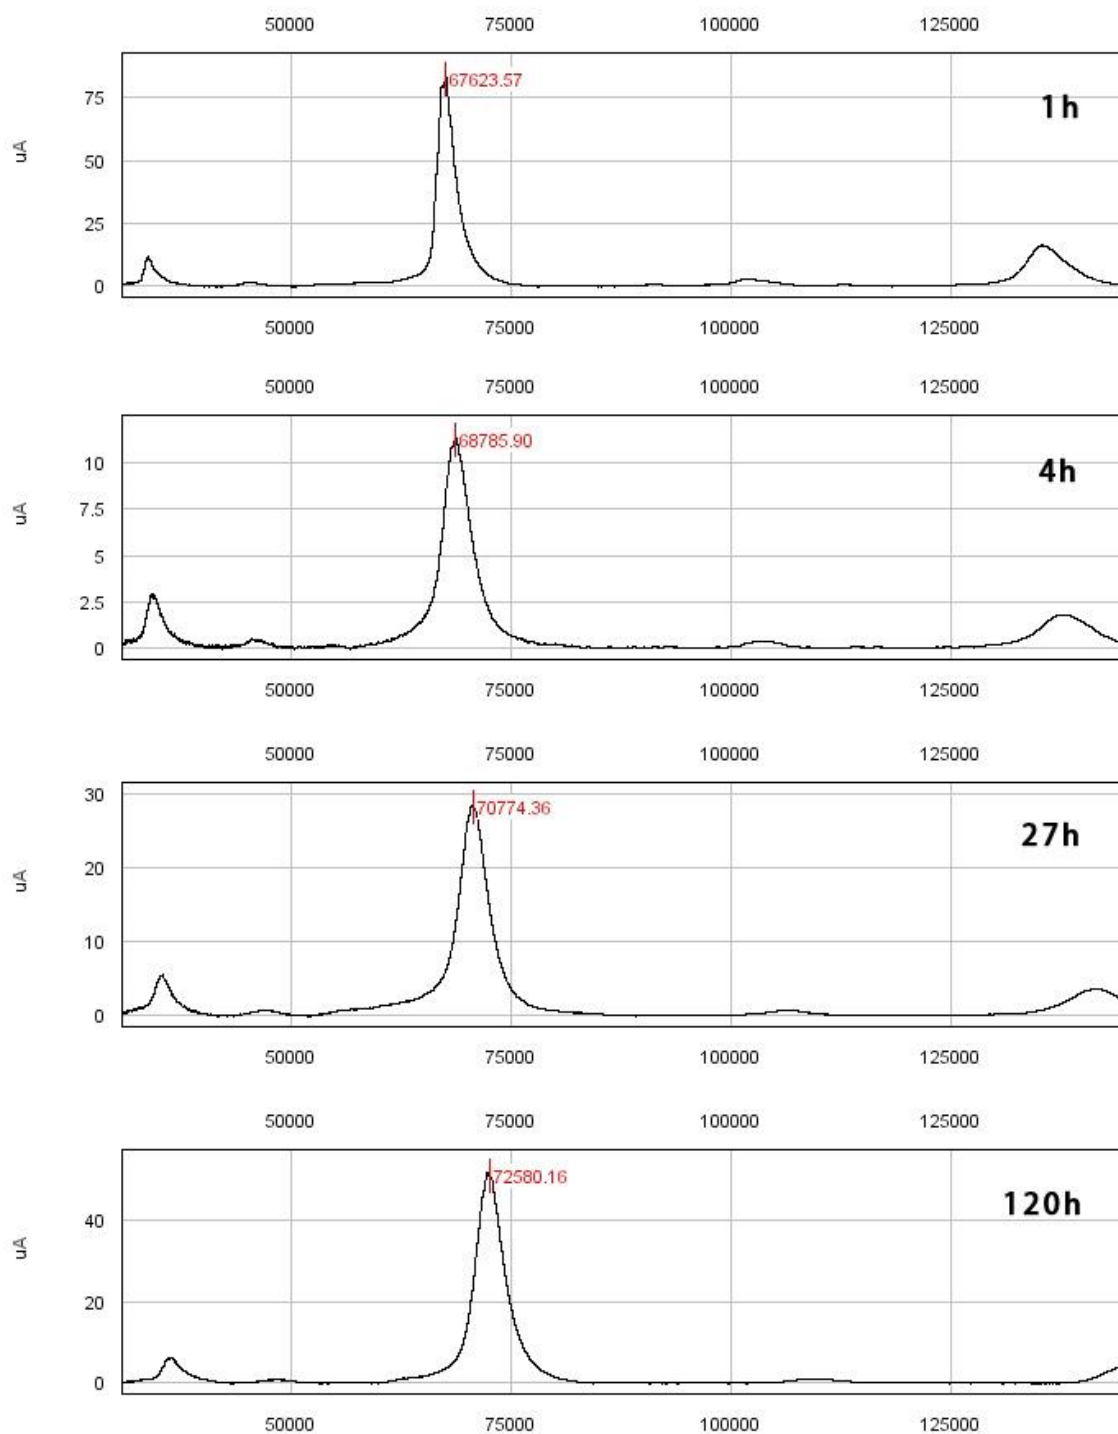

Fig. S16. SELDI-TOF monitoring of conjugation of **8** to BSA in buffer C

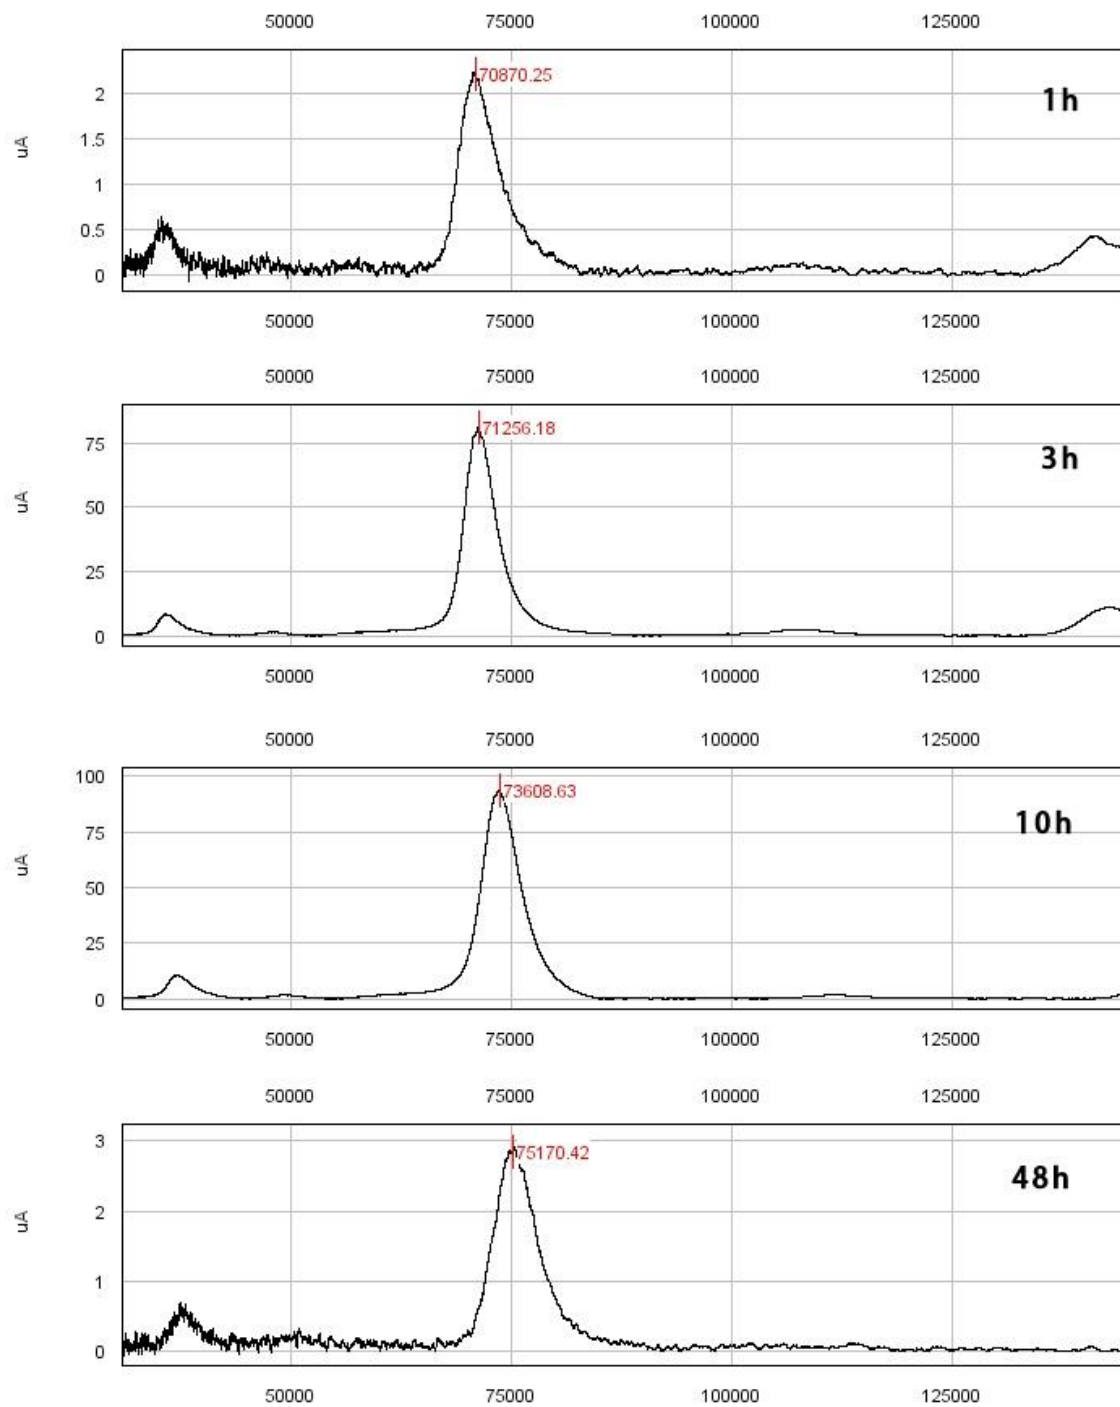

Fig. S17. SELDI-TOF monitoring of conjugation of **10** to BSA in buffer B

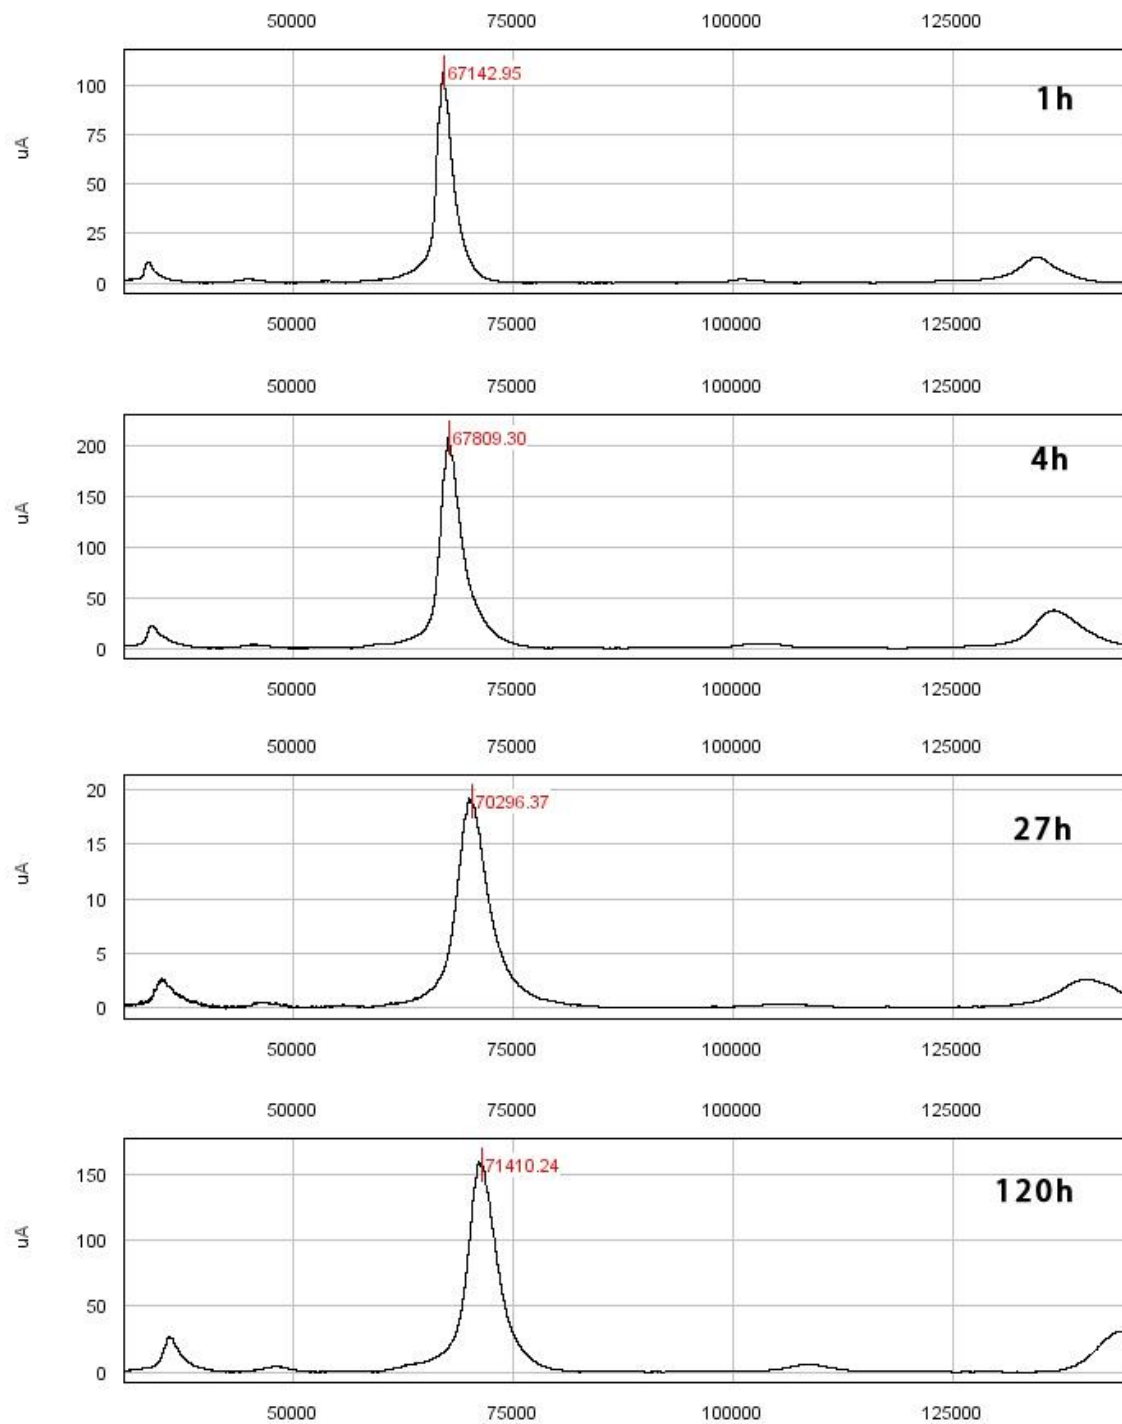

Fig. S18. SELDI-TOF monitoring of conjugation of **10** to BSA in buffer C
